# Supplementary material for: An epithelial-to-mesenchymal transition induced extracellular vesicle prognostic signature in non-small cell lung cancer
Source: PubMed Central journal article supplement (PMC9849257; doi:10.1038/s42003-022-04350-4), 2023-01-18
Supplement: 42003_2022_4350_MOESM2_ESM.pdf [file 42003_2022_4350_MOESM2_ESM.pdf]

## Description of Additional Supplementary Files

**File name:** Supplementary Data 1

**Description:** Mass spectrometry data
